# Supplementary material for: Development of Highly Efficient Resistance to Beet Curly Top Iran Virus (Becurtovirus) in Sugar Beet (B. vulgaris) via CRISPR/Cas9 System
Source: MDPI journal article supplement (doi:10.3390/ijms24076515), 2023-03-30
Supplement: s1 [file s1]

total eff. = 69.9 %

■  $p < 0.001$   
■  $p \geq 0.001$

<---deletion insertion-->

HpyCH4III

|                                                                                           |     |
|-------------------------------------------------------------------------------------------|-----|
| TCCTTGGTGTTGGATGAATCAAGAATTGCGTCTCCATTCCATGT <b>TGCTGTTGCCAATACTGTTGGAGAGCGCCTCCCATCG</b> | WT  |
| TCCTTGGTGTTGGATGAATCAAGAATTGCGTCTCCATTCCATGTTGC<<<<<<<<<<<<<<<TTGGAGAGCGCCTCCCATCG        | -17 |
| TCCTTGGTGTTGGATGAATCAAGAATTGCGTCTCCATTCCATGTTGCTGTTGCCAA<<<GTTTGGAGAGCGCCTCCCATCG         | -8  |
| TCCTTGGTGTTGGATGAATCAAGAATTGCGTCTCCATTCCATGTTGCTGTTGCCAATACgcTGTTTGGAGAGCGCCTCCCATCG      | +2  |

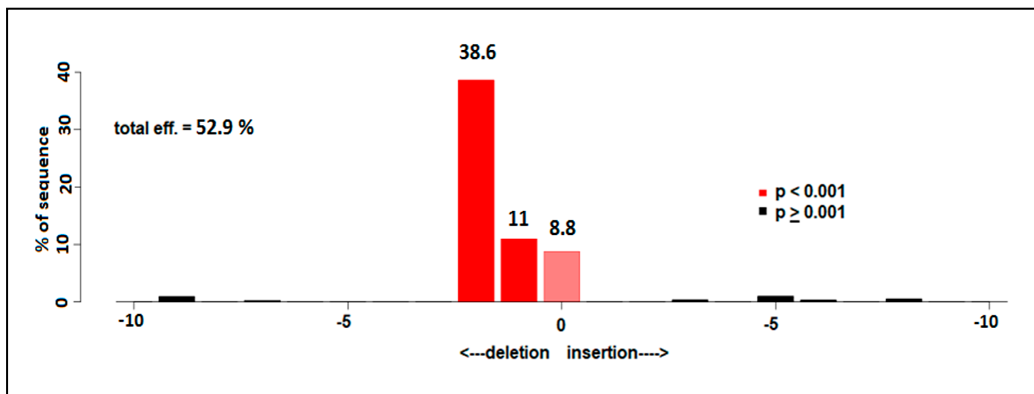

BtsI/MutI

|                                                          |                              |     |                        |         |
|----------------------------------------------------------|------------------------------|-----|------------------------|---------|
| GAGACCAATCTAATACCATGCCAGACATATAGTGGTGTCG                 | GCCTAGAGATCTTGCCCACT         | GGG | CTTTCTGTCTCGGAT        | WT      |
| GAGACCAATCTAATACCATGCCAGACATATAGTGGTGTCGGC               | <<<<<<<<<<<<<<<<<<<<<<<<<<<< |     | CTTTCTGTCTCGGAT        | -23     |
| GAGACCAATCTAATACCATGCCAGACATATAGTGGTGTCGGC               | <<<<<<<<<<<<<<<<<<<<<<<<<<<< |     | CCTGGGTCTTTCTGTCTCGGAT | -15     |
| GAGACCAATCTAATACCATGCCAGACATATAGTGGTGTCGGCCTAGAGATCTT    | <<<<                         |     | CTGGGTCTTTCTGTCTCGGAT  | -4      |
| GAGACCAATCTAATACCATGCCAGACATATAGTGGTGTCGGCCTAGAGATCTTgta |                              | CCC | ACTGGGTCTTTCTGTCTCGGAT | +3      |
| GAGACCAATCTAATACCATGCCAGACATATAGTGGTGTCGGCCTAGAGATCTTGCC | GT                           |     | CTGGGTCTTTCTGTCTCGGAT  | G>C/T>A |



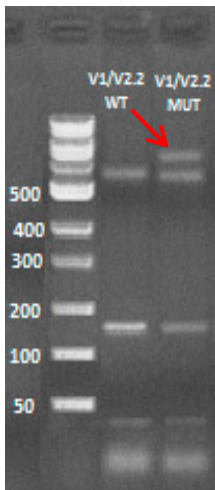

TIDE analysis of viral sequence for the gRNA/Cas9 treated overlapping region between capsid and movement gene (V1/V2)

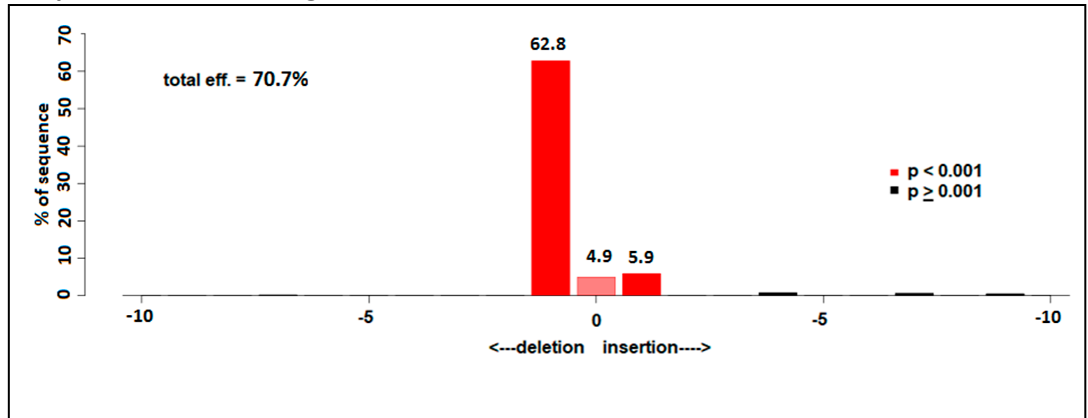

Sequences of gRNA/Cas9 targeted overlapping CP/MP region (V1/V2.2) that was not cleaved by AgeI

| AgeI                                            |                            |                      |
|-------------------------------------------------|----------------------------|----------------------|
| AAAAGAGAAAGTATACTCTCCGGCCAGTTGGACGA             | GGAAGAGGAAGACGACCGGTGGG    | AGGACAGTTTCGAAGAA WT |
| AAAAGAGAAAGTATACTCTCCGGCCAGTTGGACGA             | GGTGGGAGGACAGTTTCGAAGAA    | -20                  |
| AAAAGAGAAAGTATACTCTCCGGCCAGTTGGACGAGGAAGAGGA    | GGTGGGAGGACAGTTTCGAAGAA    | -9                   |
| AAAAGAGAAAGTATACTCTCCGGCCAGTTGGACGAGGAAGAGGAAGA | GGAGGACAGTTTCGAAGAA        | -10                  |
| AAAAGAGAAAGTATACTCTCCGGCCAGTTGGACGAGGAAGAGGAAG  | gggGGTGGGAGGACAGTTTCGAAGAA | -4/+3                |

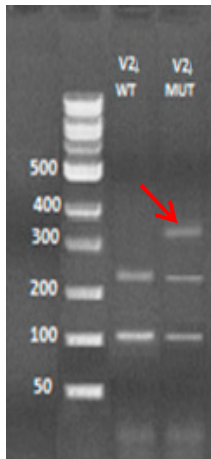

TIDE analysis of viral sequence for the gRNA/Cas9 treated movement gene (V2)

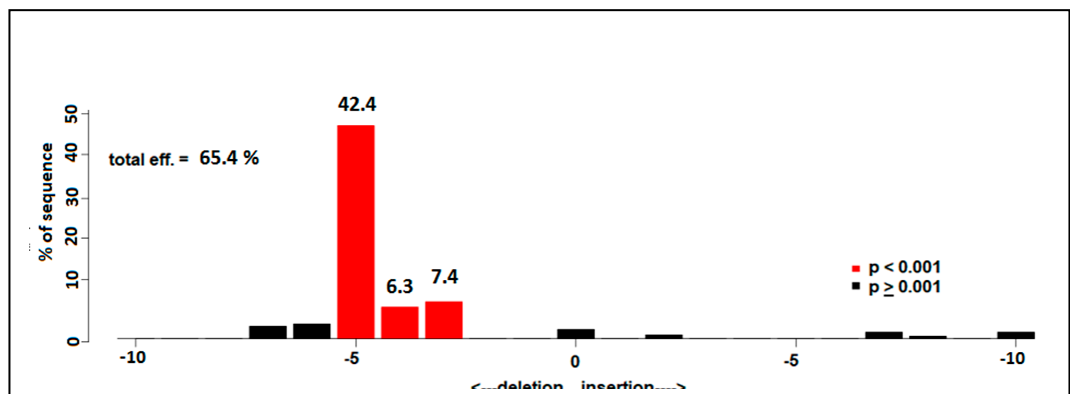

Sequences of gRNA/Cas9 targeted overlapping CP/MP region (V2) that was not cleaved by RsaI

| RsaI                                                    |                            |                   |
|---------------------------------------------------------|----------------------------|-------------------|
| GGAAGTGAAGAAATTGCTGAAGCTTAAGGTTAGTTTTAA                 | GCGTAAGTGTAGTTGTACGAGG     | ACATATACAAGAAGTAT |
| GGAAGTGAAGAAATTGCTGAAGCTTAAGGTTAGTTTTAAGCGTAA           | ACGAGGACATATACAAGAAGTAT    | -12               |
| GGAAGTGAAGAAATTGCTGAAGCTTAAGGTTAGTTTTAAGCGTAAAGTGTAGT   | AGGACATATACAAGAAGTAT       | -7                |
| GGAAGTGAAGAAATTGCTGAAGCTTAAGGTTAGTTTTAAGCGTAAAGTGTAGTTG | gtTACGAGGACATATACAAGAAGTAT | +2                |

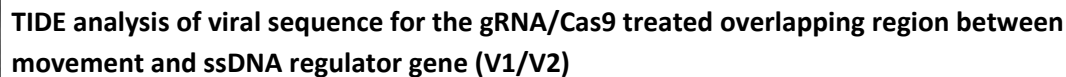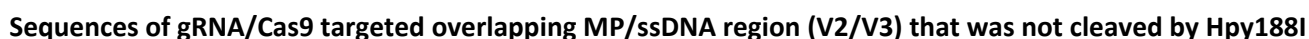

### TIDE analysis of viral sequence for the gRNA/Cas9 treated ssDNA regulator gene (V3)

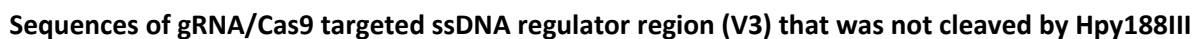

89
