# Supplementary material for: Development of Highly Efficient Resistance to Beet Curly Top Iran Virus (Becurtovirus) in Sugar Beet (B. vulgaris) via CRISPR/Cas9 System
Source: MDPI journal article supplement (doi:10.3390/ijms24076515), 2023-03-30
Supplement: s1 [file s1]

Supplementary file S1: The sequence of gRNAs and the restriction enzyme cutting site at their target site with their GC content and folding harmony with tracrRNA.

| NAME          | TARGET SITE (PAM)        | GC% | RE SITES  | gRNA - tracrRNA Folding                                                              | Targeted gene                                                  |
|---------------|--------------------------|-----|-----------|--------------------------------------------------------------------------------------|----------------------------------------------------------------|
| 1. gRNA_C1    | TTGCTGTTGCCAATACTGTTTGG  | 40  | HpyCH4III | 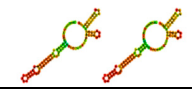   | C1-REPLICATION PROTEIN A (REP-A)                               |
| 2. gRNA_C1/C2 | GCCTAGAGATCTTGCCCACTGGG  | 55  | BtsIMutI  |    | C1/C2- INTRONIC REGION BETWEEN REPLICATION PROTEIN A and B     |
| 3. gRNA_C2    | GCAATACAAGGTCTTCCGCCTGG  | 55  | Acil      |    | C2- REPLICATION PROTEIN B (REP-B)                              |
| 4. gRNA_V1    | CCITCCACTTATCGATTAGGAG   | 45  | BsII      |    | V1-CAPSID PROTEIN (CP)                                         |
| 5. gRNA_V1/V2 | GGAAGAGGAAGACGACCGGTGGG  | 60  | AgeI      |    | V1/V2- OVERLAPPING REGION BETWEEN CAPSID AND MOVEMENT PROTEIN  |
| 6. gRNA_V2    | GCGTAAGTGTAGTTTGTACCAAGG | 45  | RsaI      |    | V2-MOVEMENT PROTEIN (MP)                                       |
| 7.gRNA_V2/V3  | CCITTCAGAGTGAGCGAATTTC   | 45  | Hpy188I   |   | V3/V2 – OVERLAPPING REGION BETWEEN ssDNA AND REGULATOR PROTEIN |
| 8. gRNA_V3    | TGATGGTGTGTATTCCCGACTGG  | 50  | Hpy188III |  | V3-ssDNA REGULATOR PROTEIN                                     |
