# Supplementary material for: Development of Highly Efficient Resistance to Beet Curly Top Iran Virus (Becurtovirus) in Sugar Beet (B. vulgaris) via CRISPR/Cas9 System
Source: MDPI journal article supplement (doi:10.3390/ijms24076515), 2023-03-30
Supplement: s1 [file s1]

**Supplementary File S2:** Experimental procedure for multiplex CRISPR targeting all functional genes of BCTIV genes named as; C1 (RepA), C2(RepB) and overlapping region between V1/V2( CP-MP) and V2/V3 (MP/ssDNA).

**Supp. File Table S1:** gRNA sequences for multiplex CRISPR

| gRNA                    | Sequence                                                   |
|-------------------------|------------------------------------------------------------|
| DT1-BsF: 3. gRNA_C1     | 5'- AATAATGGTCTCTATTGTGCTGTTGCCAATACTGTTGTT-3'             |
| DT1-F0: 3. gRNA_C1      | 5'- TGTGCTGCTTGCCAATACTGTTGTTT TAGAGCTAGAAATAGC -3'        |
|                         |                                                            |
| DT2-BsF2: 15.gRNA_V1/V2 | 5' AATAATGGTCTCTAGATTGGGAAGAGGAAGACGACCGGTGTT 3'           |
| DT2-F0: 15.gRNA_V1/V2   | 5'- TGGGAAGAGGAAGACGACCGGTGTTT TAGAGCTAGAAATAGC -3'        |
|                         |                                                            |
| DT3-BsF3: 6. gRNA_C2    | 5'- AATAATGGTCTCTGTGATTGGCAATACAAGGTCTTCCGCCGTT -3'        |
| DT3-F0: 6. gRNA_C2      | 5'- TGGCAATACAAGGTCTTCCGCCGTTT TAGAGCTAGAAATAGC -3'        |
|                         |                                                            |
| DT4-R0: 19. gRNA_V3/V2  | 5'-AAC TTCAGAGT GAGCGAATTTCCAATCACTACTTCGACTCTAGCTGTAT -3' |
| DT4-BsR: 19. gRNA_V3/V2 | 5'- ATTATTGGTCTCTAAACTTCAGAGTGAGCGAATTTCC -3'              |

**Supp. File\_Table S2.** PCR conditions for cloning of gRNA\_C1 by using pCBC-DT1T2 vector

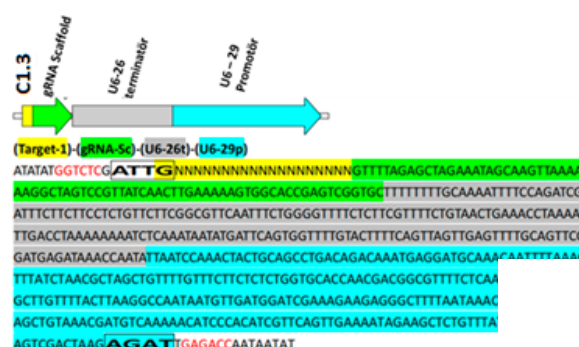

| Components                        | ( $\mu$ l) | PCR conditions                                                                              |
|-----------------------------------|------------|---------------------------------------------------------------------------------------------|
| 10 $\times$ Q5 polimeraz Buffer   | 5          | 1. One cycle: 98 $^{\circ}$ C, 30 sec.                                                      |
| MgSO <sub>4</sub> (25mM)          | 3          |                                                                                             |
| dNTPs (2mM)                       | 4          |                                                                                             |
| Q5 polimeraz                      | 1          |                                                                                             |
| pCBC-DT1T2 (diluted to 200 times) | 1          | 2. 34 cycles: 98 $^{\circ}$ C, 10 sec;<br>65 $^{\circ}$ C, 30 sec; 72 $^{\circ}$ C, 30 sec. |
| plazmid (adgene 50590)            |            |                                                                                             |
| DT1-BsF (20 $\mu$ M) gRNA C1.3    | 1          | 3. One cycle: 72 $^{\circ}$ C, 7 min                                                        |
| DT1-F0 (1 $\mu$ M) gRNA C1.3      | 1          |                                                                                             |
| DT0-BsR (20 $\mu$ M) primer       | 1          |                                                                                             |
| ddH <sub>2</sub> O                | 33         |                                                                                             |
| Total volume                      | 50 $\mu$ l |                                                                                             |

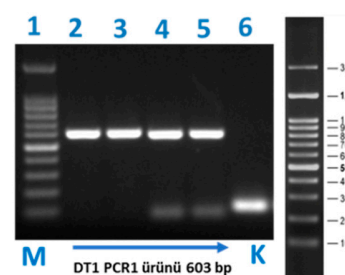

**Supp. File Table S3.** PCR conditions for cloning of gRNA V1/V2 by using pCBC-DT2T3

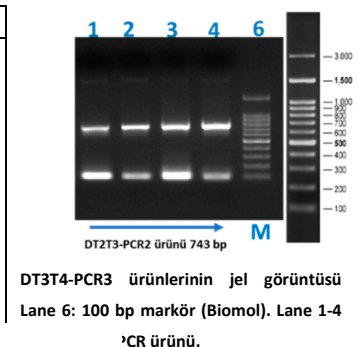

| Components                                | Quantity (ul) | Cycle                                                                                                                         |
|-------------------------------------------|---------------|-------------------------------------------------------------------------------------------------------------------------------|
| Purified DT1 PCR1 fragments (~17 ng/μl)   | 4             | <b>1. 30 cycles</b> 5 min at 37°C<br><b>2. 30 cycles</b> 5 min at 16 °C<br><b>2.</b> 5 min at 55°C<br><b>3.</b> 5 min at 80°C |
| Purified DT2T3-PCR2 fragments (~12 ng/μl) | 5             |                                                                                                                               |
| Purified DT3T4-PCR3 fragments (~11 ng/μl) | 6             |                                                                                                                               |
| pHSE401 (~160 ng/μl)                      | 2             |                                                                                                                               |
| 10× T4 DNA Ligase Buffer (NEB)            | 1.5           |                                                                                                                               |
| 10× BSA                                   | 1.5           |                                                                                                                               |
| BsaI (NEB)                                | 1             |                                                                                                                               |
| T4 DNA Ligase (HC, NEB)                   | 1             |                                                                                                                               |
| ddH2O                                     | 3             |                                                                                                                               |
| Total volume                              | 25            |                                                                                                                               |

**pHE401**  
16,653 bp

Restriction sites and coordinates (bp):

- (59) PmeI
- M13 pUC Forward (233 - 255)
- M13 Forward (247 - 264)
- AflIII (503)
- BstEII (1135)
- BssHII (1699)
- SwaI (3028)
- XbaI (3098)
- SgrDI (3835)
- AbsI (5065)
- AhdI (5238)
- TspMI - XmaI (5510)
- SmaI (5512)
- KflI (5594)
- MluI (6176)
- EcoRI (8014)
- Eco3kI (7375)
- SacI (7377)
- RsrII (9404)
- AsiSI (9440)
- SacII (10,660)
- (12,564 - 12,580) pGEX 3
- (12,466 - 12,483) 14,440
- (12,213 - 12,232) pR322ori-F
- (12,797) MreI - SgrAI
- (12,724 - 12,748) pGEX 3
- (12,599) pStZ177
- (13,695) BsiWI

Genetic elements and coordinates (bp):

- 16,000
- 14,000
- 12,000
- 10,000
- 8,000
- 6,000
- 4,000
- 2,000
- 0
- CaMV 35S promoter
- Shine-Dalgarno sequence
- CaMV 35S promoter (enhanced)
- HygR
- CaMV poly(A) signal
- King
- lacZ
- bam
- pSV1 StaA
- pGEX 3
- pR322ori-F

U6-29p-F: TTAATCCAACTACTGCAGCCTGAC and U6-1t-R: AACGGACCAATCACTTTGTCTTAGC

U6-29p-F: TTAATCCAACTACTGCAGCCTGAC and U6-1t-R: AACGGACCAATCACTTTGTCTTAGC
